# Supplementary material
Source: Springer Nature journal article supplement (https://www.springermedizin.de/resource/supplementary/12963_2009_99_MOESM4_ESM.pdf/9572660)
Supplement: MOESM4 [file 9572660]

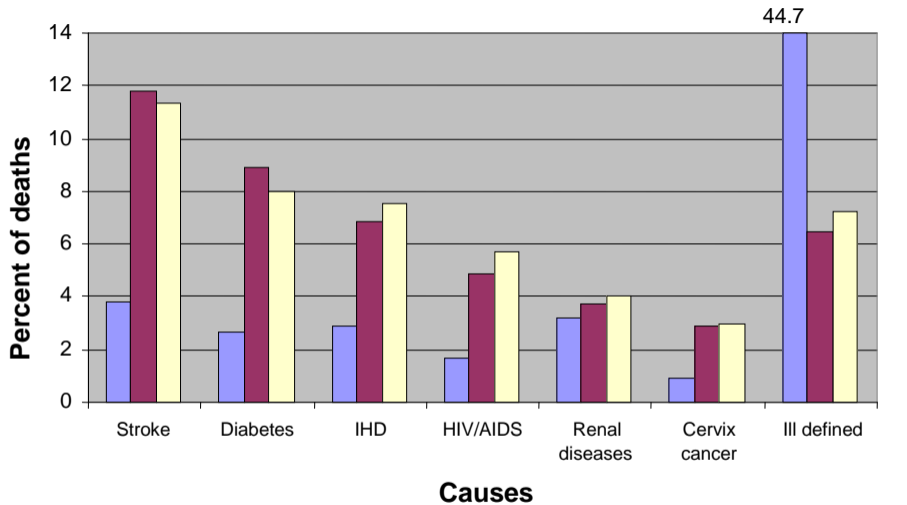

■ Vital registration

■ Adjusted for misclassification

■ Adjusted for misclassification and VA validation findings
